# Supplementary material
Source: ML conference proceedings conference paper supplement (https://proceedings.neurips.cc/paper_files/paper/2013/hash/4f284803bd0966cc24fa8683a34afc6e-Abstract.html)
Supplement: Supplementary file [file 4f284803bd0966cc24fa8683a34afc6e-Supplemental.zip]

## A Proofs of Section 3

Consider a basic full information problem with  $N$  experts. Let  $R_T(\text{SD}, i)$  be the regret of the SD algorithm with respect to expert  $i$  up to time  $T$ . We have the following results for the SD algorithm.

**Lemma 8.** *For any expert  $i \in \{1, \dots, N\}$ ,  $R_T(\text{SD}, i) \leq 4\sqrt{T \log N} + \log N$ , and also for any  $1 \leq t \leq T$ ,  $\mathbb{P}(\text{Switch at time } t) \leq \sqrt{\frac{\log N}{T}}$ .*

*Proof.* The proof of the regret bound can be found in [17, Theorem 3]. The proof of the bound on the probability of switch is similar to the proof of Lemma 2 in [17] and is as follows: As shown in [17, Lemma 2], the probability of switch at time  $t$  is  $\alpha_t = (W_{t-1} - W_t)/W_{t-1}$ . Thus,  $W_t = (1 - \alpha_t)W_{t-1}$ . Because the loss function is bounded in  $[0, 1]$ , we have that

$$W_t = \sum_{i=1}^N w_{i,t} = \sum_{i=1}^N w_{i,t-1}(1 - \eta)^{c_t(i)} \geq \sum_{i=1}^N w_{i,t-1}(1 - \eta) = (1 - \eta)W_{t-1}.$$

Thus,  $1 - \alpha_t \geq 1 - \eta$ , and thus,  $\alpha_t \leq \eta \leq \sqrt{(\log N)/T}$ .  $\square$

### A.1 Proof of Theorem 1

In the rest of this section, we write  $A$  to denote the OMDP algorithm. For the proof we use the regret decomposition (1):

$$R_T(A, \pi) = B_T(A) + C_T(A, \pi).$$

**Lemma 9.** *For any policy  $\pi \in \Pi$ ,*

$$\mathbb{E}[C_T(A, \pi)] = \mathbb{E}\left[\sum_{t=1}^T \ell_t(x_t^{\pi_t}, \pi_t) - \sum_{t=1}^T \ell_t(x_t^{\pi}, \pi)\right] \leq 4\sqrt{T \log |\Pi|} + \log |\Pi|.$$

*Proof.* Consider the following imaginary game between a learner and an adversary: we have a set of experts (policies)  $\Pi = \{\pi^1, \dots, \pi^{|\Pi|}\}$ . At round  $t$ , the adversary chooses a loss vector  $c_t \in [0, 1]^{|\Pi|}$ , whose  $i$ th element determines the loss of expert  $\pi^i$  at this round. The learner chooses a distribution over experts  $q_t$  (defined by the SD algorithm), from which it draws an expert  $\pi_t$ . Next, the learner observes the loss function  $c_t$ . From the regret bound for the SD algorithm (Lemma 8), it is guaranteed that for any expert  $\pi$ ,

$$\sum_{t=1}^T \langle c_t, q_t \rangle - \sum_{t=1}^T c_t(\pi) \leq 4\sqrt{T \log |\Pi|} + \log |\Pi|.$$

Next, we determine how the adversary chooses the loss vector. At time  $t$ , the adversary chooses a loss function  $\ell_t$  and sets  $c_t(\pi^i) = \mathbb{E}[\ell_t(x_t^{\pi^i}, \pi^i)]$ . Noting that  $\langle c_t, q_t \rangle = \mathbb{E}[\ell_t(x_t^{\pi_t}, \pi_t)]$  and  $c_t(\pi) = \mathbb{E}[\ell_t(x_t^{\pi}, \pi)]$  finishes the proof.  $\square$

**Lemma 10.** *We have that*

$$\mathbb{E}[B_T(A)] = \mathbb{E}\left[\sum_{t=1}^T \ell_t(x_t^A, a_t) - \sum_{t=1}^T \ell_t(x_t^{\pi_t}, \pi_t)\right] \leq 2\tau^2 \sqrt{\log |\Pi| T}.$$

First, we state the following two lemmas.

**Lemma 11** (Lemma 5.1 of Even-Dar et al. [12]). *For any state distribution  $d$ , any transition kernel  $m$ , and any policies  $\pi$  and  $\pi'$ ,*

$$\|dP(\pi, m) - dP(\pi', m)\|_1 \leq \|\pi - \pi'\|_{\infty, 1}.$$

Note that matrix  $P(\pi, m)$  was defined for finite state spaces, but with appropriate modifications the same argument works for continuous state spaces as well.

**Lemma 12.** *Let  $\alpha_t$  be the probability of a policy switch at time  $t$ . Then,  $\alpha_t \leq \sqrt{\log |\Pi|/T}$ .*

*Proof.* Proof is identical to the proof of Lemma 8.  $\square$

*Proof of Lemma 10.* Let  $\mathcal{F}_t = \sigma(\pi_1, \dots, \pi_t)$ . Notice that the choice of policies are independent of the state variables. We can write

$$\begin{aligned}
\mathbb{E}[B_T(A)] &= \mathbb{E} \left[ \sum_{t=1}^T \ell_t(x_t^A, a_t) - \sum_{t=1}^T \ell_t(x_t^{\pi_t}, \pi_t) \right] \\
&= \mathbb{E} \left[ \sum_{t=1}^T \sum_{x \in \mathcal{X}} \left( \mathbb{I}_{\{x_t^A=x\}} - \mathbb{I}_{\{x_t^{\pi_t}=x\}} \right) \ell_t(x, \pi_t(x)) \right] \\
&= \mathbb{E} \left[ \sum_{t=1}^T \sum_{x \in \mathcal{X}} \mathbb{E} \left[ \left( \mathbb{I}_{\{x_t^A=x\}} - \mathbb{I}_{\{x_t^{\pi_t}=x\}} \right) \ell_t(x, \pi_t(x)) \mid \mathcal{F}_T \right] \right] \\
&= \mathbb{E} \left[ \sum_{t=1}^T \sum_{x \in \mathcal{X}} \ell_t(x, \pi_t(x)) \mathbb{E} \left[ \left( \mathbb{I}_{\{x_t^A=x\}} - \mathbb{I}_{\{x_t^{\pi_t}=x\}} \right) \mid \mathcal{F}_T \right] \right] \\
&\leq \mathbb{E} \left[ \sum_{t=1}^T \|\ell_t\|_\infty \left\| \mathbb{E} \left[ \left( \mathbb{I}_{\{x_t^A=x\}} - \mathbb{I}_{\{x_t^{\pi_t}=x\}} \right) \mid \mathcal{F}_T \right] \right\|_1 \right] \\
&= \mathbb{E} \left[ \sum_{t=1}^T \|\ell_t\|_\infty \|u_t - v_{t,t}\|_1 \right] \\
&\leq \mathbb{E} \left[ \sum_{t=1}^T \|u_t - v_{t,t}\|_1 \right], \tag{2}
\end{aligned}$$

where  $u_s = \mathbb{E}[\mathbb{I}_{\{x_s^A=x\}} \mid \mathcal{F}_T]$  is the distribution of  $x_s^A$  for  $s \leq t$  and  $v_{s,t} = \mathbb{E}[\mathbb{I}_{\{x_s^{\pi_t}=x\}} \mid \mathcal{F}_T]$  is the distribution of  $x_s^{\pi_t}$  for  $s \leq t$ .<sup>5</sup> Let  $E_t$  be the event of a policy switch at time  $t$ . From inequality

$$\|\pi_{t-k} - \pi_t\|_{\infty,1} \leq \|\pi_{t-k} - \pi_{t-k+1}\|_{\infty,1} + \dots + \|\pi_{t-1} - \pi_t\|_{\infty,1} \leq 2 \sum_{s=t-k+1}^t \mathbb{I}_{\{E_s\}},$$

and Lemma 12, we get that

$$\mathbb{E} \left[ \|\pi_{t-k} - \pi_t\|_{\infty,1} \right] \leq 2 \sqrt{\frac{\log |\Pi|}{T}} k. \tag{3}$$

---

<sup>5</sup>Notice that  $\mathcal{F}_T$  contains only policies, which are independent of the state variables.

Let  $P_t^\pi = P(\pi, m_t)$ . We have that

$$\begin{aligned}
\mathbb{E} [\|u_t - v_{t,t}\|_1] &= \mathbb{E} [\|u_{t-1}P_{t-1}^{\pi_{t-1}} - v_{t-1,t}P_{t-1}^{\pi_t}\|_1] \\
&= \mathbb{E} [\|u_{t-1}P_{t-1}^{\pi_{t-1}} - u_{t-1}P_{t-1}^{\pi_t} + u_{t-1}P_{t-1}^{\pi_t} - v_{t-1,t}P_{t-1}^{\pi_t}\|_1] \\
&\leq \mathbb{E} [\|u_{t-1}P_{t-1}^{\pi_{t-1}} - u_{t-1}P_{t-1}^{\pi_t}\|_1 + \|u_{t-1}P_{t-1}^{\pi_t} - v_{t-1,t}P_{t-1}^{\pi_t}\|_1] \\
&\leq \mathbb{E} [\|\pi_{t-1} - \pi_t\|_{\infty,1} + e^{-1/\tau} \|u_{t-1} - v_{t-1,t}\|_1] \\
&\leq \mathbb{E} [\|\pi_{t-1} - \pi_t\|_{\infty,1} + e^{-1/\tau} (\|u_{t-2}P_{t-2}^{\pi_{t-2}} - u_{t-2}P_{t-2}^{\pi_t}\|_1 \\
&\quad + \|u_{t-2}P_{t-2}^{\pi_t} - v_{t-2,t}P_{t-2}^{\pi_t}\|_1)] \\
&\leq \mathbb{E} [\|\pi_{t-1} - \pi_t\|_{\infty,1} + e^{-1/\tau} \|\pi_{t-2} - \pi_t\|_{\infty,1} + e^{-2/\tau} \|u_{t-2} - v_{t-2,t}\|_1] \\
&\leq \dots \\
&\leq \sum_{k=0}^t e^{-k/\tau} \mathbb{E} [\|\pi_{t-k} - \pi_t\|_{\infty,1}] + e^{-t/\tau} \|u_0 - v_{0,t}\|_1 \\
&\leq \sum_{k=0}^t 2e^{-k/\tau} \sqrt{\frac{\log |\Pi|}{T}} k + 0 \quad \text{By (3)} \\
&\leq 2\sqrt{\frac{\log |\Pi|}{T}} \tau^2, \tag{4}
\end{aligned}$$

where we have used the fact that  $\|u_0 - v_{0,t}\|_1 = 0$ , because the initial distributions are identical. By (4) and (2), we get that

$$\mathbb{E} [B_T(A)] \leq 2\tau^2 \sum_{t=1}^T \sqrt{\frac{\log |\Pi|}{T}} = 2\tau^2 \sqrt{\log |\Pi| T}.$$

□

What makes the analysis possible is the fact that all policies mix no matter what transition kernel is played by the adversary.

*Proof of Theorem 1.* The result is obvious by Lemmas 9 and 10. □

## A.2 Proof of Corollary 2

*Proof of Corollary 2.* Let  $L_T(\pi) = \mathbb{E} [\sum_{t=1}^T \ell_t(x_t^\pi, \pi)]$  be the value of policy  $\pi$ . Let  $u_{\pi,t}(x) = \mathbb{P}(x_t^\pi = x)$ . First, we prove that the value function is Lipschitz with Lipschitz constant  $\tau T$ . The argument is similar to the argument in the proof of Lemma 10. For any  $\pi_1$  and  $\pi_2$ ,

$$\begin{aligned}
|L_T(\pi_1) - L_T(\pi_2)| &= \left| \mathbb{E} \left[ \sum_{t=1}^T \ell_t(x_t^{\pi_1}, \pi_1) - \sum_{t=1}^T \ell_t(x_t^{\pi_2}, \pi_2) \right] \right| \leq 2 \left| \sum_{t=1}^T \|u_{\pi_1,t} - u_{\pi_2,t}\|_1 \|\ell_t\|_\infty \right| \\
&\leq 2 \left| \sum_{t=1}^T \|u_{\pi_1,t} - u_{\pi_2,t}\|_1 \right|.
\end{aligned}$$

With an argument similar to the one in the proof of Lemma 10, we can show that  $\|u_{\pi_1,t} - u_{\pi_2,t}\|_1 \leq \tau \|\pi_1 - \pi_2\|_{\infty,1}$ . Thus,  $|L_T(\pi_1) - L_T(\pi_2)| \leq \tau T \|\pi_1 - \pi_2\|_{\infty,1}$ . Given this and the fact that for any policy  $\pi \in \Pi$ , there is a policy  $\pi' \in \mathcal{C}(\epsilon)$  such that  $\|\pi - \pi'\|_{\infty,1} \leq \epsilon$ , we get that

$$\mathbb{E} [R_T(\text{OMDP}, \pi)] \leq (4 + 2\tau^2) \sqrt{T \log \mathcal{N}(\epsilon)} + \log \mathcal{N}(\epsilon) + \tau T \epsilon.$$

□

## B Proof of Theorem 7

Let  $x_{t,l}$  and  $a_{t,l}$  denote the state and the action at step  $l$  of episode  $t$ . Let  $x_{t,l}^\pi$  denote the state at stage  $l$  of round  $t$  if we run policy  $\pi$ . As  $c(x, a) = c(n(x), a)$ , we can write that

$$R_T(\pi) = \sum_{t=1}^T \sum_{l=1}^L c_t(x_{t,l}^\pi, \pi_t) - \sum_{t=1}^T \sum_{l=1}^L c_t(x_{t,l}, \pi).$$

We have the following regret decomposition:

$$R_T(\pi) = B_T + C_T,$$

where

$$B_T = \sum_{t=1}^T \sum_{l=1}^L \left( c_t(x_{t,l}^\pi, \pi_t) - Q_t(s, \pi_t)/L \right), \quad C_T = \sum_{t=1}^T \sum_{l=1}^L \left( Q_t(s, \pi_t)/L - c_t(x_{t,l}, \pi) \right).$$

We bound these terms in the following sections.

### B.1 Bounding $\mathbb{E}[C_T]$

First, we prove the following lemma.

**Lemma 13.** *Let  $\pi$  be a policy. Let  $x = (s, a_0, n_1, a_1, \dots, n_{l-1}, a_{l-1}, n_l)$ . We have that*

$$\sum_{x \in \mathcal{X}_l} \pi(a_0|s) \dots \pi(a_{l-1}|n_{l-1}) \leq |\mathcal{G}|.$$

*Proof.* For any graph  $g$ ,

$$\sum_{x: g \in C(x)} \pi(a_0|s) \dots \pi(a_{l-1}|n_{l-1}) = 1.$$

We get the result by summing over the graphs. □

**Lemma 14.** *We have that*

$$\mathbb{E}[C_T] \leq L |\mathcal{G}| \sqrt{T \log \frac{|\mathcal{A}|}{2}} + L \sqrt{8T \log(2T)} + L.$$

*Proof.* For any step  $l$  during an episode  $t$ , we have that  $Q_t(x_{t,l}^\pi, \pi) = c_t(x_{t,l}^\pi, \pi) + \mathbb{E}[Q_t(x_{t,l+1}^\pi, \pi_t) | x_{t,l}^\pi]$ . Thus,

$$\begin{aligned} Q_t(x_{t,l}^\pi, \pi) &= c_t(x_{t,l}^\pi, \pi) + \mathbb{E}[Q_t(x_{t,l+1}^\pi, \pi_t) | x_{t,l}^\pi] - \mathbb{E}[Q_t(x_{t,l}^\pi, \pi_t) | x_{t,l-1}^\pi] \\ &\quad + \mathbb{E}[Q_t(x_{t,l}^\pi, \pi_t) | x_{t,l-1}^\pi] - Q_t(x_{t,l}^\pi, \pi_t) + Q_t(x_{t,l}^\pi, \pi_t). \end{aligned}$$

For episode  $t$ ,

$$\begin{aligned} \sum_{l=1}^L (Q_t(x_{t,l}^\pi, \pi) - Q_t(x_{t,l}, \pi_t)) &= \sum_{l=1}^L c_t(x_{t,l}^\pi, \pi) \\ &\quad + \sum_{l=1}^L (\mathbb{E}[Q_t(x_{t,l+1}^\pi, \pi_t) | x_{t,l}^\pi] - \mathbb{E}[Q_t(x_{t,l}^\pi, \pi_t) | x_{t,l-1}^\pi]) \\ &\quad + \sum_{l=1}^L (\mathbb{E}[Q_t(x_{t,l}^\pi, \pi_t) | x_{t,l-1}^\pi] - Q_t(x_{t,l}^\pi, \pi_t)) \\ &= -Q_t(s, \pi_t) + \sum_{l=1}^L c_t(x_{t,l}^\pi, \pi) \\ &\quad + \sum_{l=1}^L (\mathbb{E}[Q_t(x_{t,l}^\pi, \pi_t) | x_{t,l-1}^\pi] - Q_t(x_{t,l}^\pi, \pi_t)). \end{aligned}$$

Thus,

$$\begin{aligned} \sum_{t=1}^T \sum_{l=1}^L (Q_t(s, \pi_t)/L - c_t(x_{t,l}^\pi, \pi)) &= \sum_{t=1}^T \sum_{l=1}^L (Q_t(x_{t,l}^\pi, \pi_t) - Q_t(x_{t,l}^\pi, \pi)) \\ &\quad + \sum_{l=1}^L (\mathbb{E}[Q_t(x_{t,l}^\pi, \pi_t) | x_{t,l-1}^\pi] - Q_t(x_{t,l}^\pi, \pi_t)) \end{aligned} \quad (5)$$

Let  $\mu_{\pi,t,l}(\cdot)$  be the state distribution at stage  $l$  of round  $t$  under policy  $\pi$ . For  $x = (s, a_0, n_1, a_1, \dots, n_l)$ , we can write

$$\mu_{\pi,t,l}(x) = \pi(a_0|s) \mathbb{I}_{\{g_t(s, a_0)=n_1\}} \dots \pi(a_{l-1}|n_{l-1}) \mathbb{I}_{\{g_t(n_{l-1}, a_{l-1})=n_l\}}.$$

Introduce the notation

$$\pi(a_{0\dots(l-1)}|x) = \pi(a_0|s) \dots \pi(a_{l-1}|n_{l-1}), \quad \mathbb{I}_{\{g_t(n_{1\dots l}|x)\}} = \mathbb{I}_{\{g_t(s, a_0)=n_1\}} \dots \mathbb{I}_{\{g_t(n_{l-1}, a_{l-1})=n_l\}}.$$

We have that

$$\begin{aligned} \mathbb{E} \left[ \sum_{t=1}^T \sum_{l=1}^L (Q_t(x_{t,l}^\pi, \pi_t) - Q_t(x_{t,l}^\pi, \pi)) \right] &= \sum_{t=1}^T \sum_{l=1}^L \sum_{x \in \mathcal{X}_l} \mu_{\pi,t,l}(x) (Q_t(x, \pi_t) - Q_t(x, \pi)) \\ &= \sum_{l=1}^L \sum_{x \in \mathcal{X}_l} \sum_{t=1}^T \mu_{\pi,t,l}(x) (Q_t(x, \pi_t) - Q_t(x, \pi)) \\ &= \sum_{l=1}^L \sum_{x \in \mathcal{X}_l} \sum_{t=1}^T \pi(a_{0\dots(l-1)}|x) \mathbb{I}_{\{g_t(n_{1\dots l}|x)\}} (Q_t(x, \pi_t) - Q_t(x, \pi)) \\ &= \sum_{l=1}^L \sum_{x \in \mathcal{X}_l} \pi(a_{0\dots(l-1)}|x) \sum_{t=1}^T \mathbb{I}_{\{g_t(n_{1\dots l}|x)\}} (Q_t(x, \pi_t) - Q_t(x, \pi)), \end{aligned}$$

where the last step follows from the fact that  $\pi(a_{0\dots(l-1)}|x)$  does not depend on time. Thus, we can write

$$\begin{aligned} \mathbb{E} \left[ \sum_{t=1}^T \sum_{l=1}^L (Q_t(x_{t,l}^\pi, \pi_t) - Q_t(x_{t,l}^\pi, \pi)) \right] &\leq \sqrt{T \log \frac{|\mathcal{A}|}{2}} \sum_{l=1}^L \sum_{x \in \mathcal{X}_l} \pi(a_{0\dots(l-1)}|x) \\ &\leq L |\mathcal{G}| \sqrt{T \log \frac{|\mathcal{A}|}{2}}, \end{aligned} \quad (6)$$

where the first step follows from the regret bound for the EWA algorithm [16] and the second step follows from Lemma 13.

Finally, by an application of Azuma's inequality, we obtain that

$$\sum_{l=1}^L (\mathbb{E}[Q_t(x_{t,l}^\pi, \pi_t) | x_{t,l-1}^\pi] - Q_t(x_{t,l}^\pi, \pi_t)) \leq L \sqrt{8T \log(2T)} + L. \quad (7)$$

From (5),(6),(7), we obtain the desired result:

$$\mathbb{E} \left[ \sum_{t=1}^T \sum_{l=1}^L (Q_t(s, \pi_t)/L - c_t(x_{t,l}^\pi, \pi)) \right] \leq L |\mathcal{G}| \sqrt{T \log \frac{|\mathcal{A}|}{2}} + L \sqrt{8T \log(2T)} + L.$$

□

## B.2 Bounding $\mathbb{E}[B_T]$

**Lemma 15.** *We have that  $\mathbb{E}[B_T] \leq L \sqrt{8T \log(2T)} + L$ .*

*Proof.* We have that  $Q_t(x_{t,l}^{\pi_t}, \pi_t) = \mathbb{E} \left[ c_t(x_{t,l}^{\pi_t}, \pi_t) + Q_t(x_{t,l+1}^{\pi_t}, \pi_t) \mid x_{t,l}^{\pi_t} \right]$ . Thus,

$$\begin{aligned} Q_t(x_{t,l}^{\pi_t}, \pi_t) - \mathbb{E} \left[ Q_t(x_{t,l}^{\pi_t}, \pi_t) \mid x_{t,l-1}^{\pi_t} \right] &= \mathbb{E} \left[ c_t(x_{t,l}^{\pi_t}, \pi_t) \mid x_{t,l}^{\pi_t} \right] \\ &\quad + \mathbb{E} \left[ Q_t(x_{t,l+1}^{\pi_t}, \pi_t) \mid x_{t,l}^{\pi_t} \right] - \mathbb{E} \left[ Q_t(x_{t,l}^{\pi_t}, \pi_t) \mid x_{t,l-1}^{\pi_t} \right] . \end{aligned}$$

For episode  $t$ ,

$$\begin{aligned} \sum_{l=1}^L \left( Q_t(x_{t,l}^{\pi_t}, \pi_t) - \mathbb{E} \left[ Q_t(x_{t,l}^{\pi_t}, \pi_t) \mid x_{t,l-1}^{\pi_t} \right] \right) &= \sum_{l=1}^L \mathbb{E} \left[ c_t(x_{t,l}^{\pi_t}, \pi_t) \mid x_{t,l}^{\pi_t} \right] \\ &\quad + \sum_{l=1}^L \left( \mathbb{E} \left[ Q_t(x_{t,l+1}^{\pi_t}, \pi_t) \mid x_{t,l}^{\pi_t} \right] - \mathbb{E} \left[ Q_t(x_{t,l}^{\pi_t}, \pi_t) \mid x_{t,l-1}^{\pi_t} \right] \right) \\ &= -Q_t(s, \pi_t) + \sum_{l=1}^L \mathbb{E} \left[ c_t(x_{t,l}^{\pi_t}, \pi_t) \mid x_{t,l}^{\pi_t} \right] . \end{aligned}$$

Thus,

$$\sum_{t=1}^T \sum_{l=1}^L \left( \mathbb{E} \left[ c_t(x_{t,l}^{\pi_t}, \pi_t) \mid x_{t,l}^{\pi_t} \right] - Q_t(s, \pi_t)/L \right) = \sum_{t=1}^T \sum_{l=1}^L \left( Q_t(x_{t,l}^{\pi_t}, \pi_t) - \mathbb{E} \left[ Q_t(x_{t,l}^{\pi_t}, \pi_t) \mid x_{t,l-1}^{\pi_t} \right] \right) .$$

Thus, by an application of Azuma's inequality, we obtain that

$$\mathbb{E} \left[ \sum_{t=1}^T \sum_{l=1}^L (c_t(x_{t,l}^{\pi_t}, \pi_t) - Q_t(s, \pi_t)/L) \right] \leq L\sqrt{8T \log(2T)} + L .$$

□

*Proof of Theorem 7.* The result is obvious by Lemmas 14 and 15.

□
